# Supplementary material for: Measuring the Similarity of Different Types of Fuzzy Sets in FRDB.
Source: Royal Society of Chemistry journal article supplement (doi:10.1039/d0ra05131d), 2007-01-01
Supplement: d0ra05131d1.pdf [file d0ra05131d1.pdf]

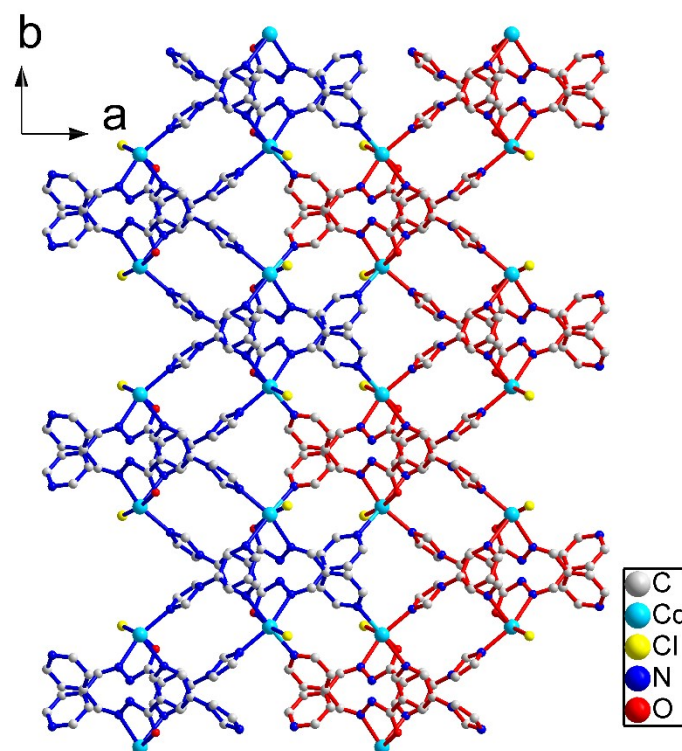

**Fig. S1** The parallel arrangement of 2D networks along *a* axis and connected through Cd–N<sub>pyridyl</sub> bonds to form a 3D framework in **2**.

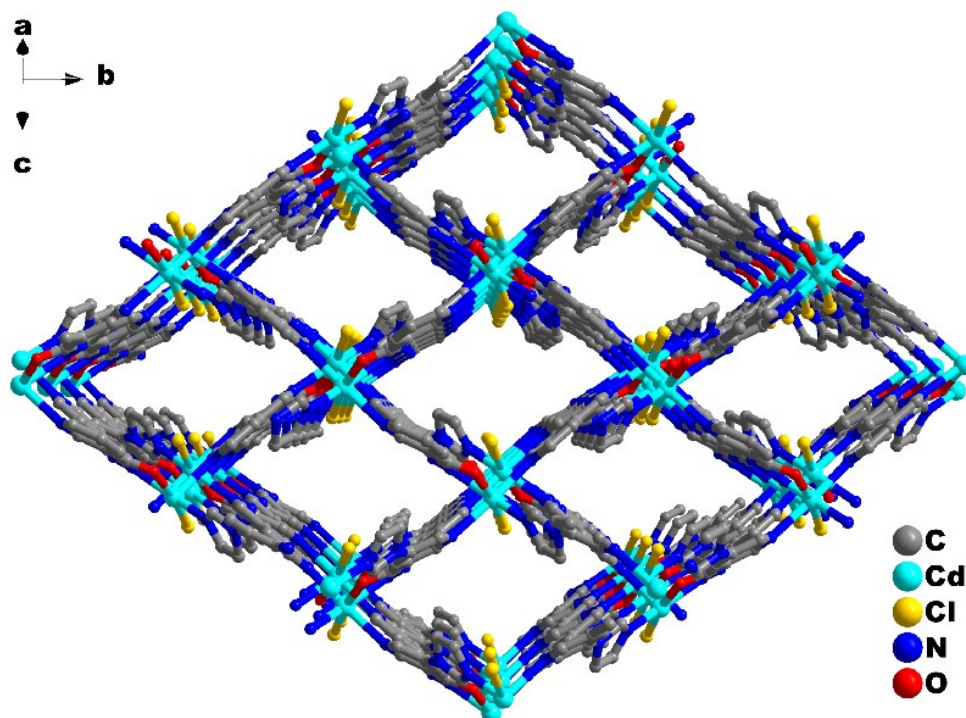

**Fig. S2** The 3D framework of **2**, and the rhombic channels view along the crystallographic [101] direction.

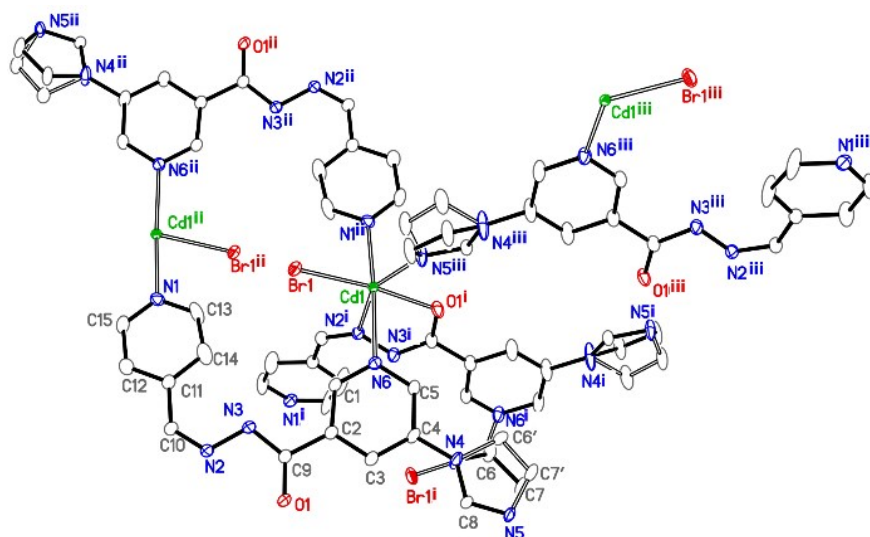

**Fig. S3** The coordination environment of Cd(II) centers in **3**, with displacement ellipsoids drawn at the 50% probability level.

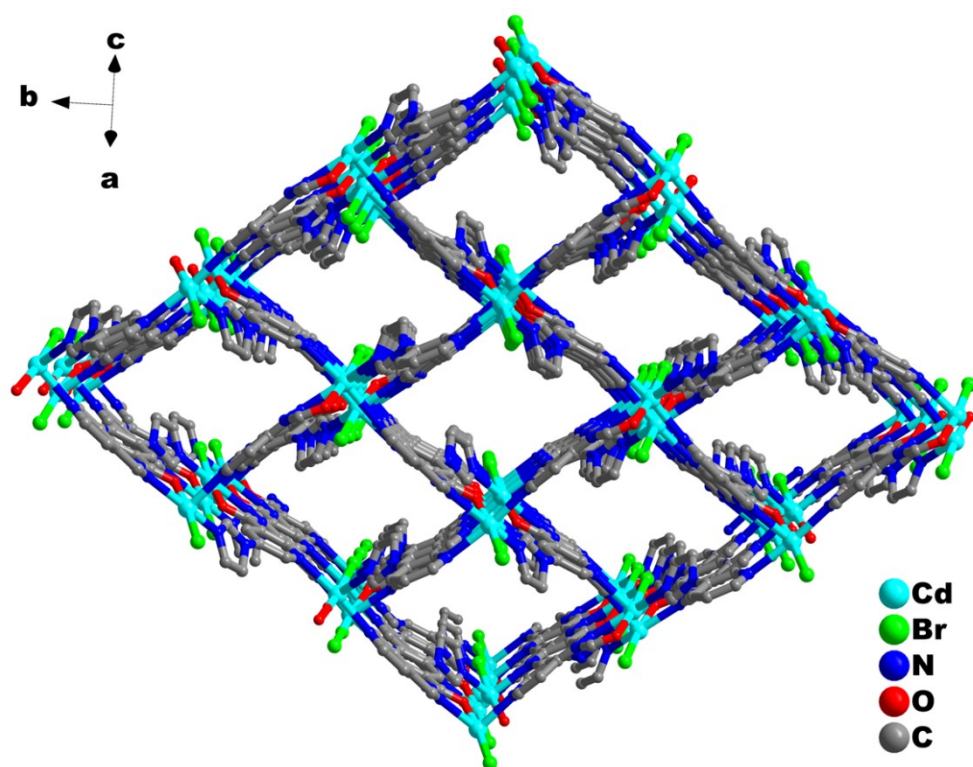

**Fig. S4** The 3D framework of **3**, and the rhombic channels view along the crystallographic [101] direction.

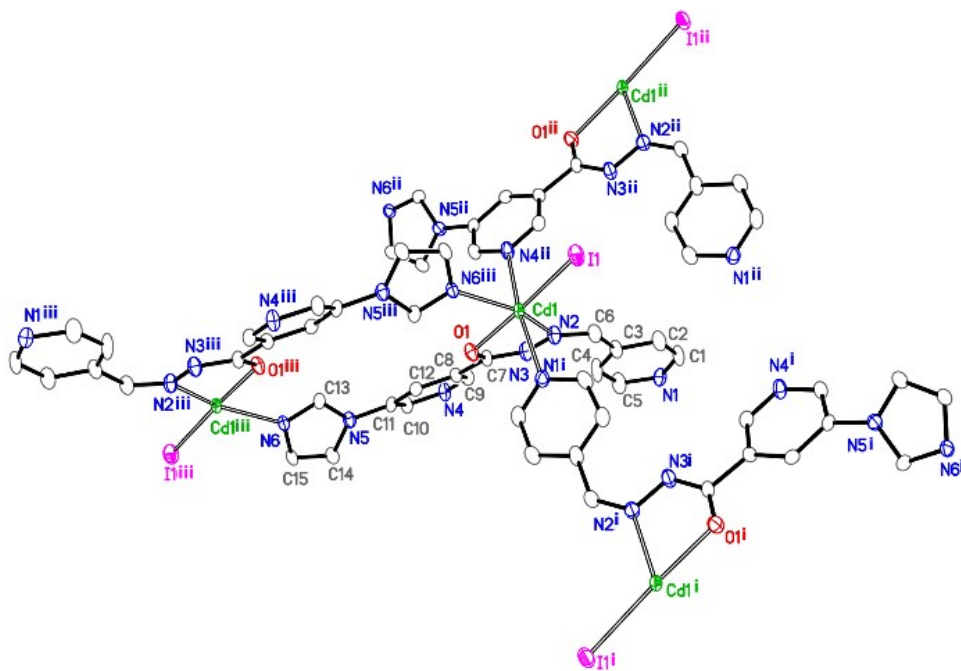

**Fig. S5** The coordination environment of Cd(II) centers in **4**, with displacement ellipsoids drawn at the 50% probability level.

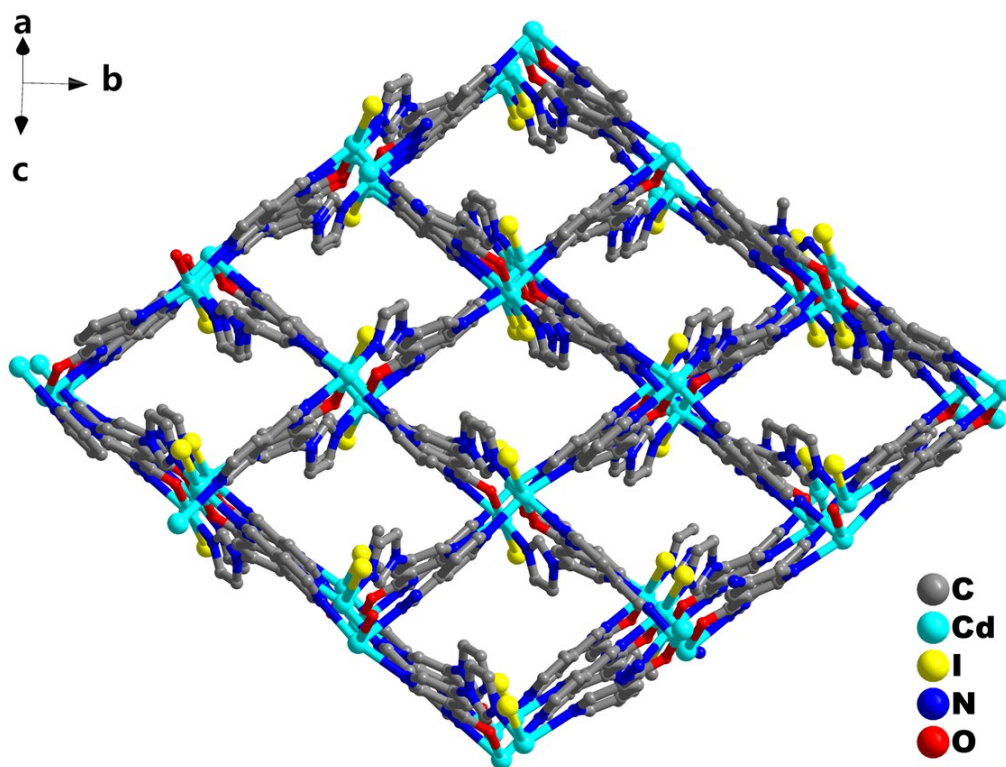

**Fig. S6** The 3D framework of **4**, and the rhombic channels view along the crystallographic [101] direction.

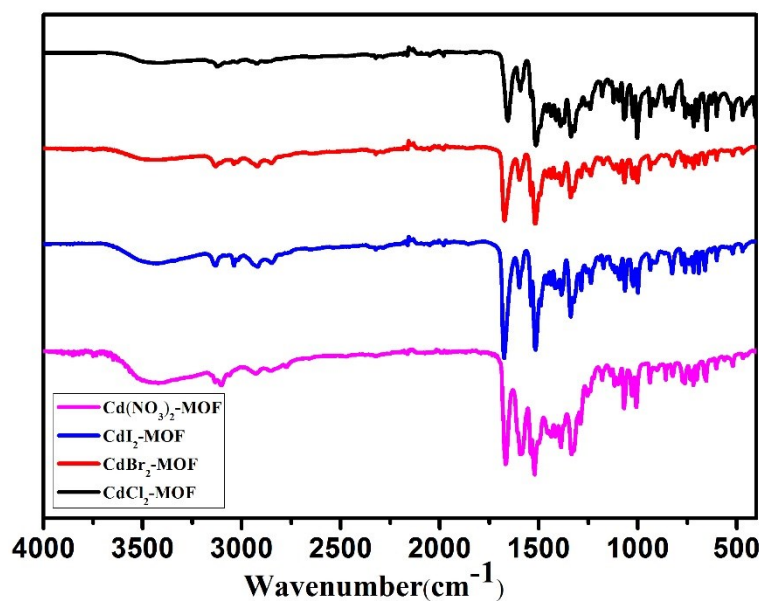

Fig. S7 IR spectra of 1-4.

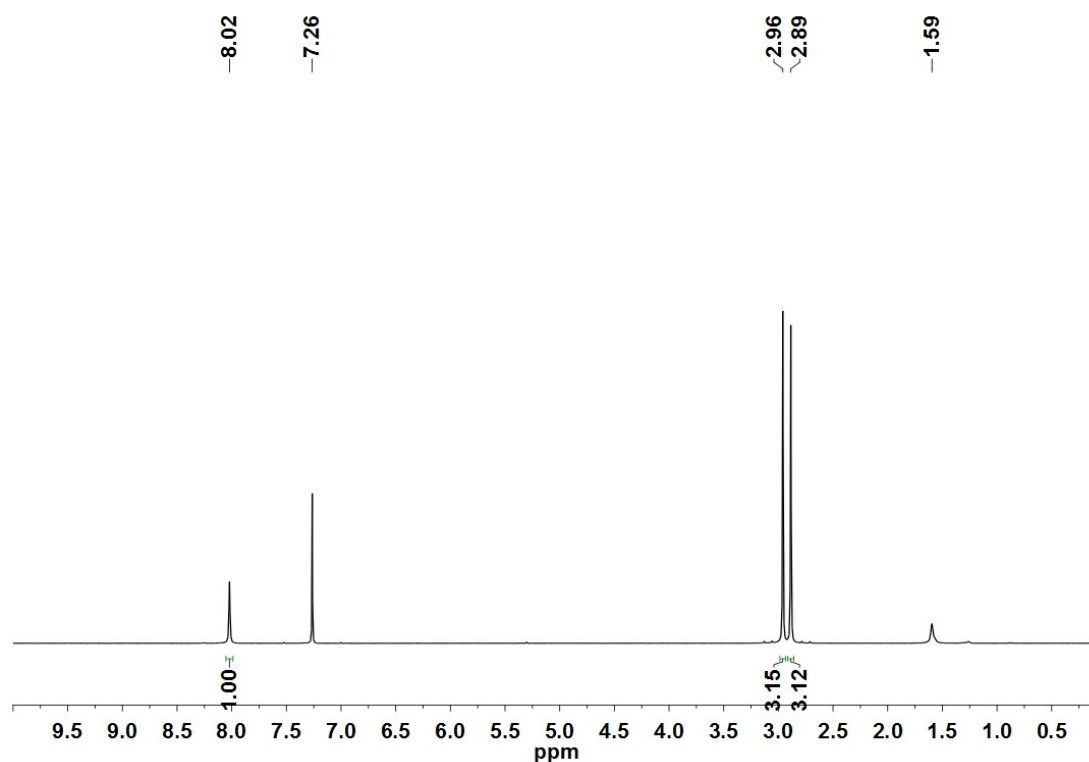

**Fig. S8**  $^1\text{H}$  NMR spectrum ( $\text{CDCl}_3$ ) showing the existence of *N,N*-Dimethylformamide guest molecules in the channels. The Cd(II) MOFs are not soluble in normal solvents, so the  $^1\text{H}$  NMR measurement was performed on the  $\text{CDCl}_3$  extract of the as-synthesized MOF crystals.



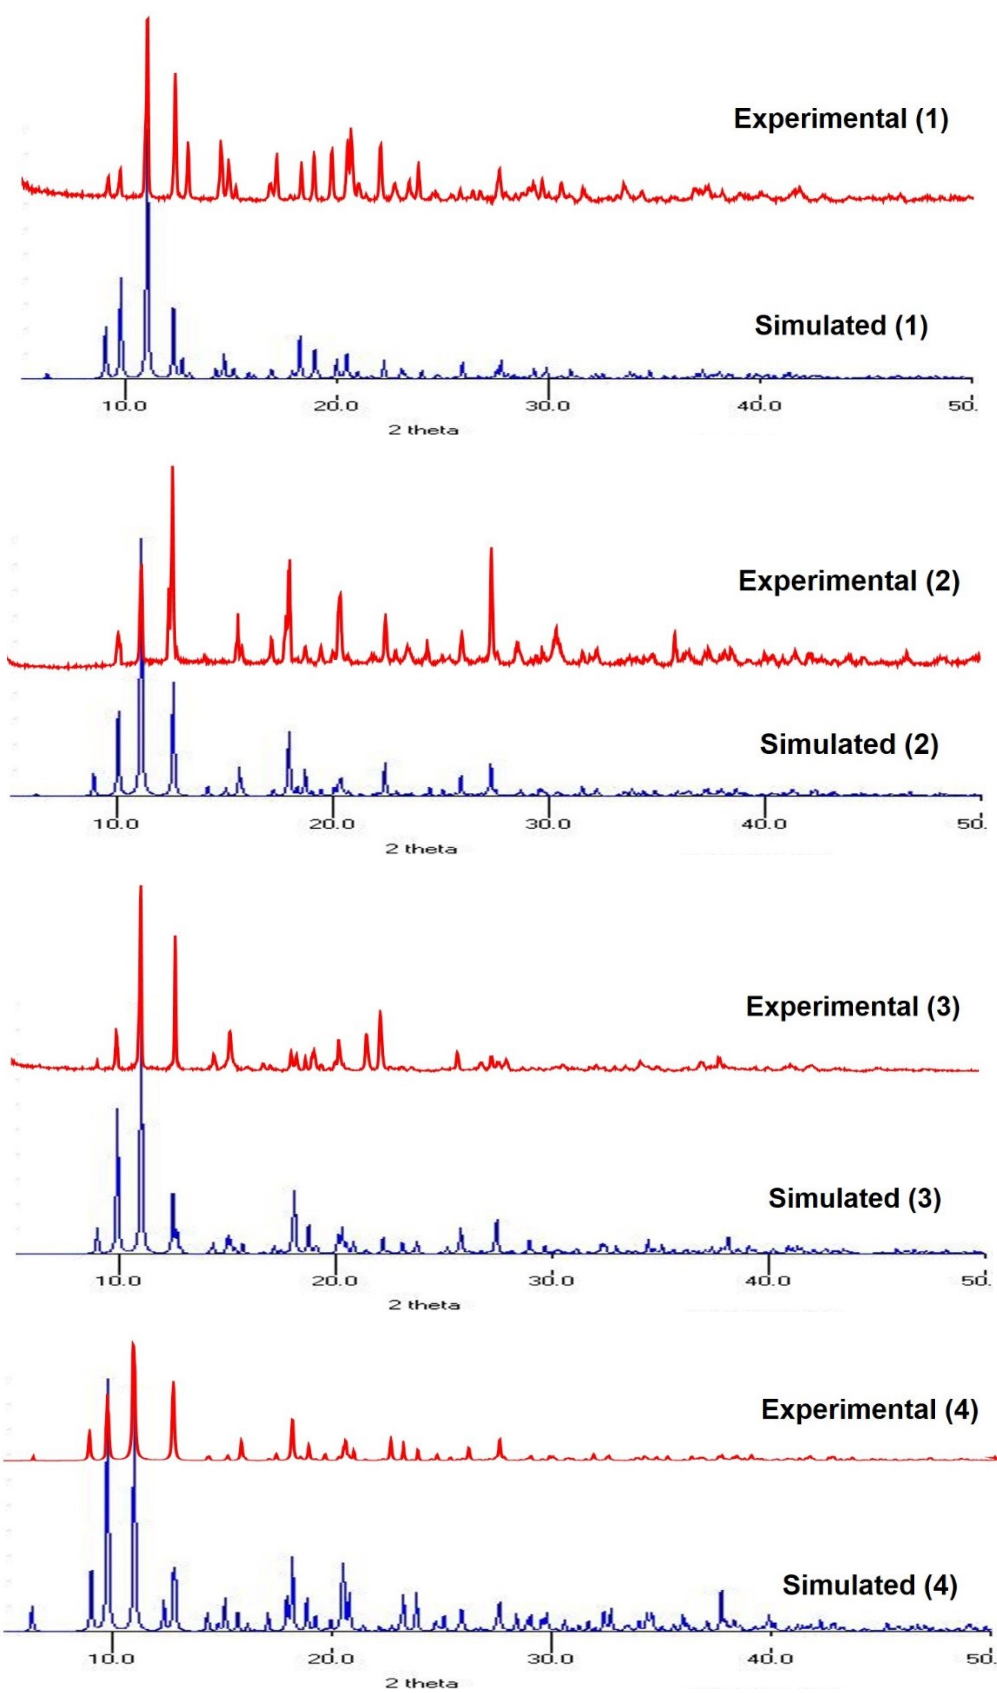

Fig. S9 PXR patterns of 1-4.
